# Supplementary material for: Coaxial Electrospun PLLA Fibers Modified with Water-Soluble Materials for Oligodendrocyte Myelination
Source: MDPI journal article supplement (doi:10.3390/polym13203595), 2021-10-19
Supplement: s1 [file s1]

# Coaxial Electrospun PLLA Fibers Modified with Water-Soluble Materials for Oligodendrocyte Myelination

Zhepeng Liu <sup>1,\*</sup>, Jing Wang <sup>1</sup>, Haini Chen <sup>1</sup>, Guanyu Zhang <sup>2</sup>, Zhuman Lv <sup>2</sup>, Yijun Li <sup>1</sup>, Shoujin Zhao <sup>1</sup> and Wenlin Li <sup>2,\*</sup>

<sup>1</sup> School of Medical Instrument and Food Engineering, University of Shanghai for Science and Technology, Shanghai 200093, China

<sup>2</sup> Department of Cell Biology, Second Military Medical University, Shanghai 200433, China

\* Correspondence: zpliu@usst.edu.cn (Z.L.); liwenlin@smmu.edu.cn (W.L.)

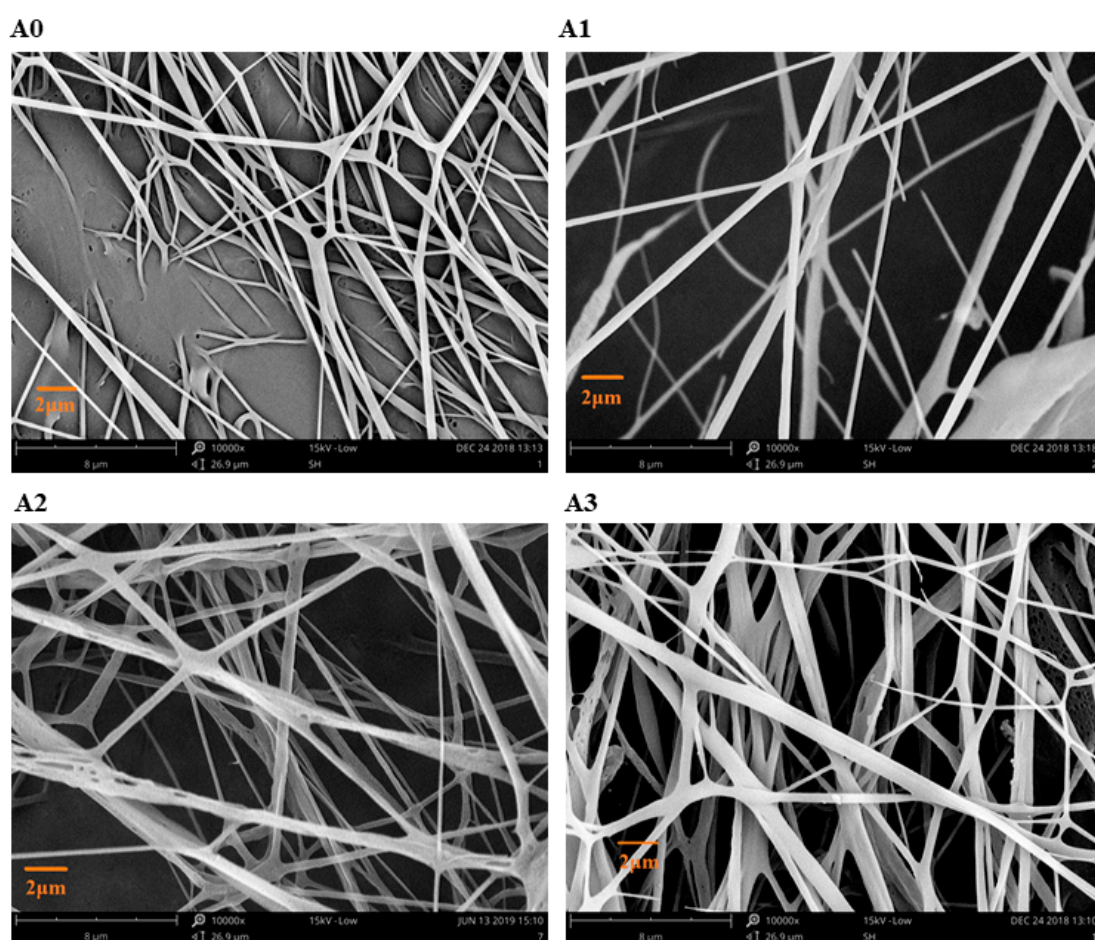

**Figure S1.** SEM images of electrospinning fibers. A0: 6% PLLA, A1: 1% sodium alginate (shell) – 6% PLLA (core), A2: 1% sodium hyaluronate (shell) – 6% PLLA (core), A3: 1% chitosan (shell) – 6% PLLA (core).

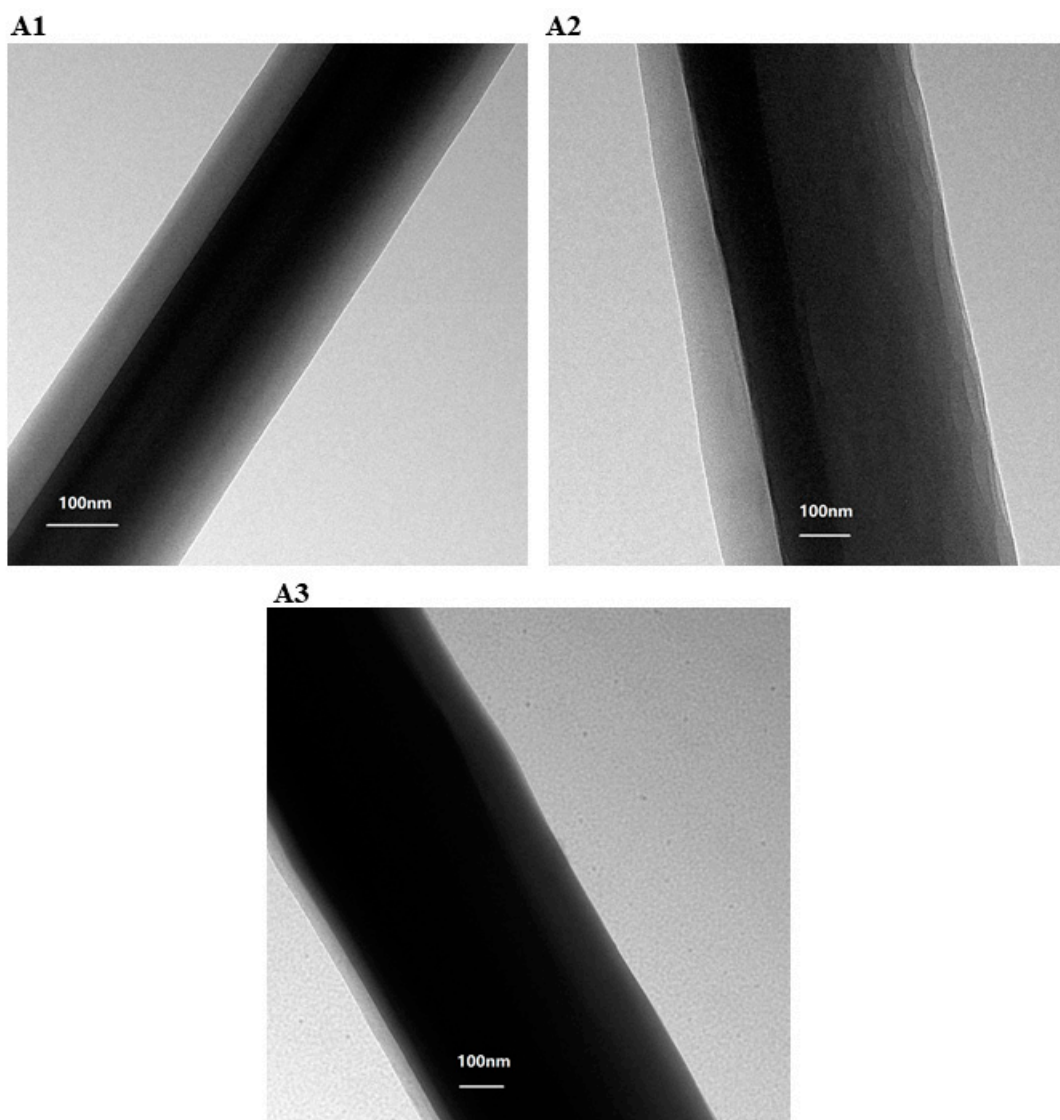

**Figure S2.** TEM images of electrospinning fibers. A1: 1% sodium alginate (shell) – 6% PLLA (core), A2: 1% sodium hyaluronate (shell) – 6% PLLA (core), A3: 1% chitosan (shell) – 6% PLLA (core).
